# Supplementary material
Source: Elsevier journal article supplement (https://www.sciencedirect.com/science/article/pii/S234128791930105X)
Supplement: mmc1 [file S234128791930105X:mmc1.docx]

Anexo I. Escalas de valoración del dolor y la ansiedad.

1. Escala de caras de WONG-BAKER. Valoración del dolor en niños menores de 7 años:


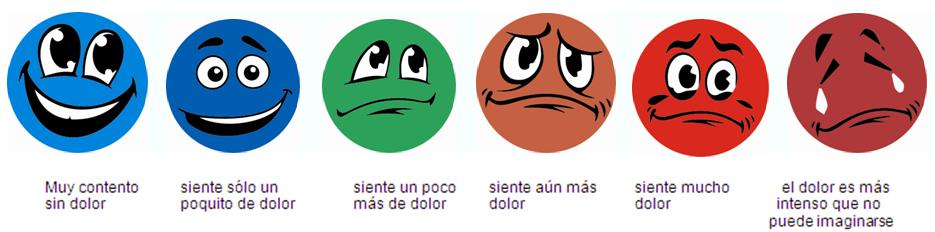


0 1 2 3 4 5

1. Escala visual analógica (VAS). Valoración del dolor en niños mayores de 7 años:
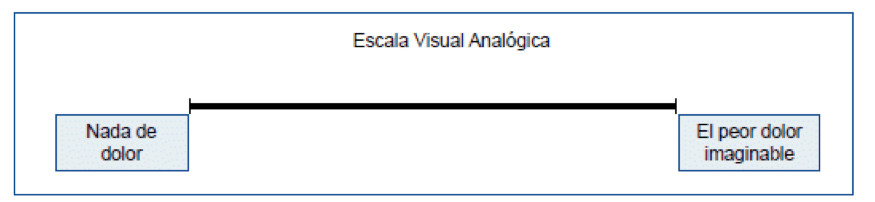


0 1 2 3 4 5

1. Escala numérica de dolor (NRS): Valoración del dolor por adultos:

0 1 2 3 4 5

0 = nada de dolor y 5 = Peor dolor imaginable

1. Escala del miedo en niños (FCS).Valoración de la ansiedad por niños y adultos:
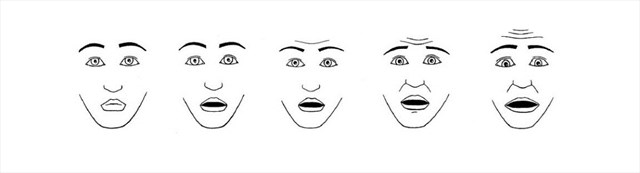


0 1 2 3 4
